# Supplementary material for: NiCo2O4 nano-needles as an efficient electro-catalyst for simultaneous water splitting and dye degradation
Source: Royal Society of Chemistry journal article supplement (doi:10.1039/d3ra03012a), 2023-01-01
Supplement: d3ra03012a1.pdf [file d3ra03012a1.pdf]

## NiCo<sub>2</sub>O<sub>4</sub> nano-Needles as an Efficient Electro-Catalyst for Simultaneous Water Splitting and Dye Degradation

Muhammad Bilal<sup>1</sup>, Amna Altaf<sup>1</sup>, Ehmen Bint-E-Khalid<sup>1</sup>, Hafiza Komal Zafar<sup>1</sup>, Nimrah Tahir<sup>1</sup>, Ayman Nafady<sup>2</sup>, Md. Abdul Wahab<sup>3</sup>, Syed Shoaib Ahmad Shah<sup>1</sup>, Tayyaba Najam<sup>4\*</sup>, Manzar Sohail<sup>1\*</sup>

<sup>1</sup> Department of Chemistry, School of Natural Sciences, National University of Sciences and Technology, Islamabad, 44000, Pakistan

<sup>2</sup> Chemistry Department, College of Science, King Saud University, Riyadh 11451, Saudi Arabia

<sup>3</sup> Energy and Process Engineering Laboratory, School of Mechanical, Medical and Process Engineering, Faculty of Science, Queensland University of Technology (QUT), 2 George Street Brisbane, QLD 4000, Australia

<sup>4</sup> Institute of Chemistry, The Islamia University of Bahawalpur, 63100, Pakistan

\*Corresponding author(s):

E-mail address: [manzar.sohail@sns.nust.edu.pk](mailto:manzar.sohail@sns.nust.edu.pk), and [tayyabanajam@outlook.com](mailto:tayyabanajam@outlook.com)

Table S1: Comparison of current densities of different catalysts

| Catalyst name | Overpotential (mV) | Electrolyte | On-set potential | Tafel slope | References |
|---------------|--------------------|-------------|------------------|-------------|------------|
|---------------|--------------------|-------------|------------------|-------------|------------|

|                                                                        | @ 10 mA cm <sup>-2</sup>   |           | (V)  | (mV dec <sup>-1</sup> ) |            |
|------------------------------------------------------------------------|----------------------------|-----------|------|-------------------------|------------|
| NiCo <sub>2</sub> O <sub>4</sub> (Petals and needle-like morphologies) | 170@10 mA cm <sup>-2</sup> | 1 M KOH   | 1.34 | 90                      | This paper |
| NiCo <sub>2</sub> O <sub>4</sub> (Petals and needle-like morphologies) | 370@50 mA cm <sup>-2</sup> | 1 M KOH   | 1.55 | 90                      | This paper |
| NiO                                                                    | 470                        | 1 M KOH   | 1.60 | 117                     | [1]        |
| NiCo <sub>2</sub> O <sub>4</sub>                                       | 430                        | 1M NaOH   | 1.59 | 61                      | [2]        |
| NiCo <sub>2</sub> O <sub>4</sub> /NiO                                  | 360                        | 1M NaOH   | 1.41 | 139                     | [2]        |
| NiCo <sub>2</sub> O <sub>4</sub> nanoflowers                           | 383                        | 1 M KOH   | 1.50 | 137                     | [3]        |
| NiCo <sub>2</sub> O <sub>4</sub> hollow nanospheres                    | 428                        | 1 M KOH   | 1.53 | 141                     | [3]        |
| NiCo <sub>2</sub> O <sub>4</sub> hollow                                | 520                        | 0.1 M KOH | 1.57 | 150                     | [4]        |
| NiCo <sub>2</sub> S <sub>4</sub> nanoflakes                            | 360                        | 1 M KOH   | 1.54 | 131                     | [5]        |
| NiCo <sub>2</sub> O <sub>4</sub> nanowires                             | 271                        | 1 M KOH   | 1.52 | 172                     | [6]        |
| Co <sub>3</sub> O <sub>4</sub>                                         | 498                        | 1 M KOH   | 1.65 | 268                     | [7]        |
| MnCo <sub>2</sub> O <sub>4</sub> nanowires                             | 289                        | 1 M KOH   | 1.53 | 182                     | [6]        |

|                                            |     |           |      |     |     |
|--------------------------------------------|-----|-----------|------|-----|-----|
| ZnCo <sub>2</sub> O <sub>4</sub> nanosheet | 340 | 1 M KOH   | 1.52 | 183 | [6] |
| Ni@ NiO/N-C                                | 390 | 1M KOH    | 1.54 | 100 | [8] |
| 3D Gr/Ni-MOF                               | 370 | 0.1 M KOH | 1.57 | 91  | [9] |

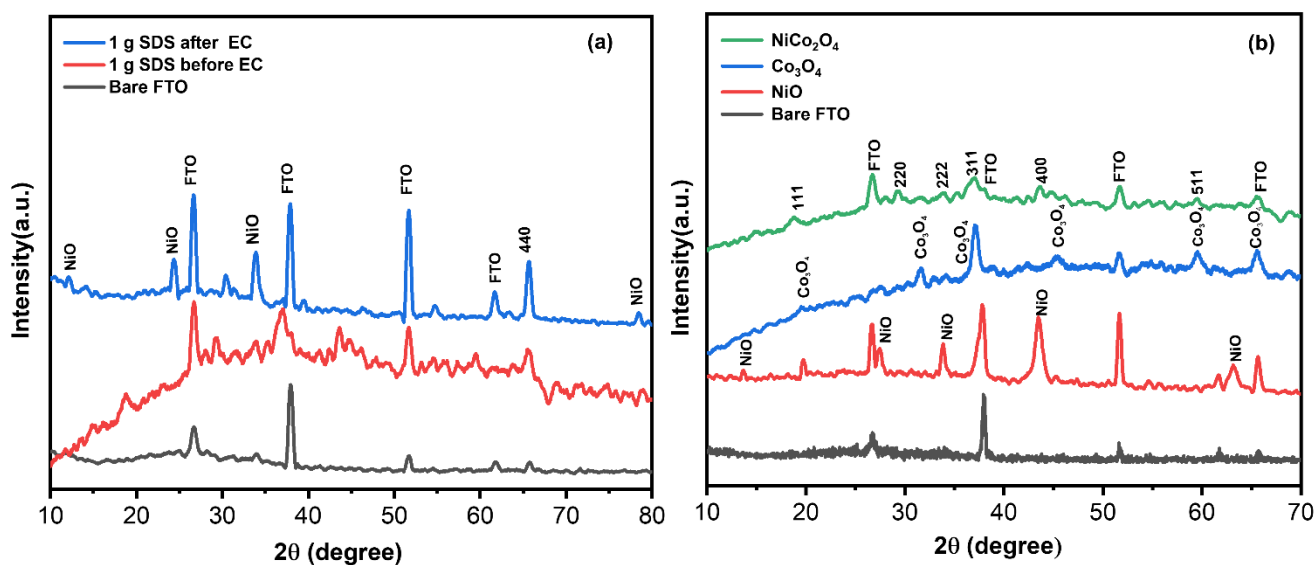

Figure S1: (a) p-XRD graph of NiCo<sub>2</sub>O<sub>4</sub> with respective oxides and before and after EC (b) p-XRD of respective oxides

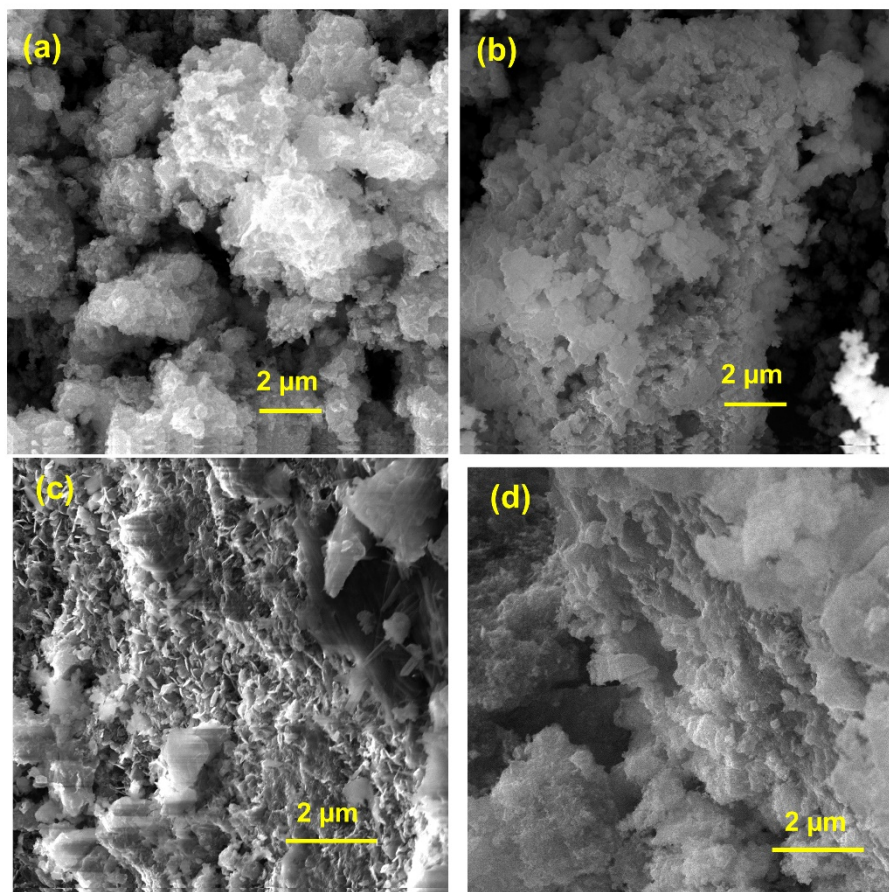

Figure S2: SEM images of NiCo<sub>2</sub>O<sub>4</sub> synthesized at different temperatures (a) 50°C, (b) 100°C and SDS amount (c) 0.5 g (d) 1.5 g

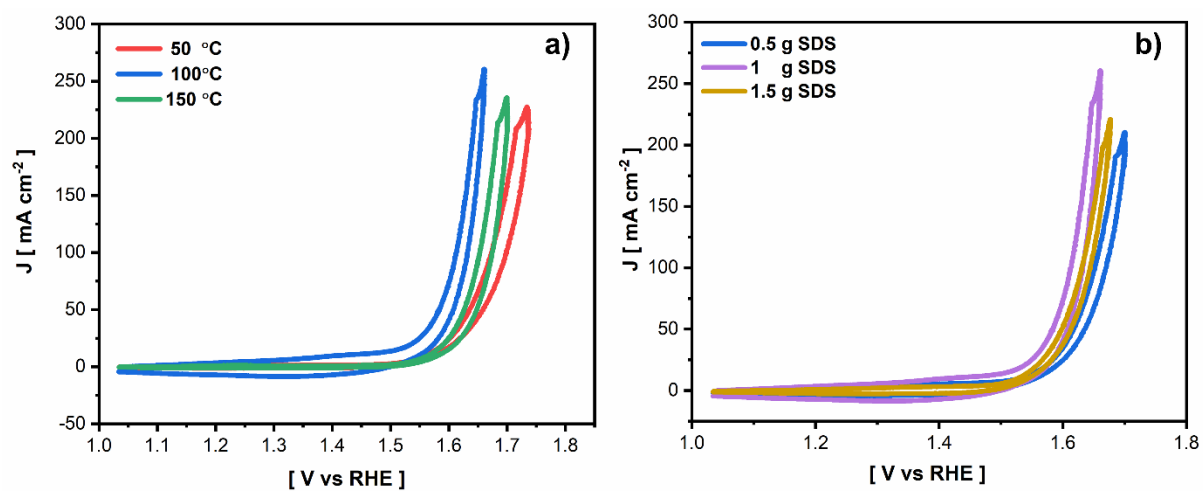

Figure S3: CV of NiCo<sub>2</sub>O<sub>4</sub> synthesized at different (a) temperatures (b) SDS amount.

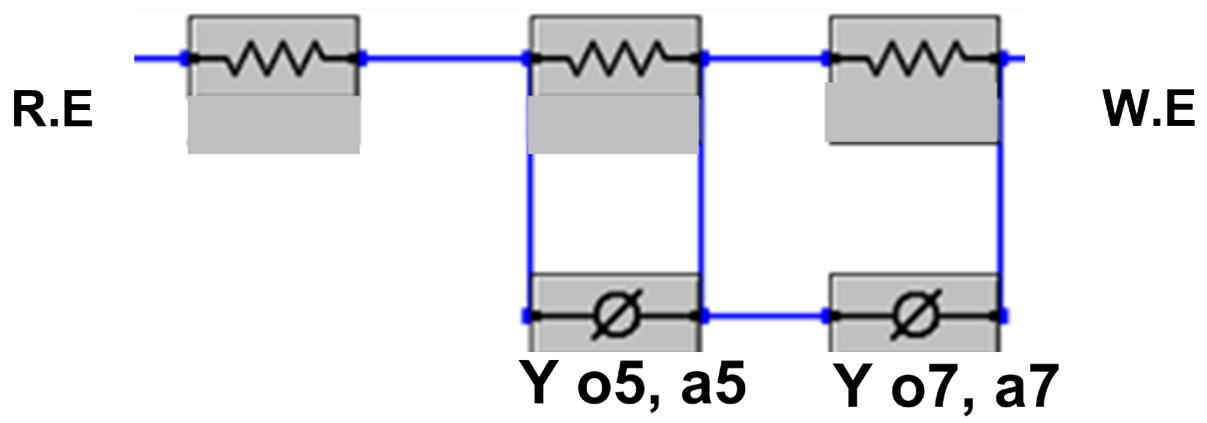

Figure S4: Circuit for fitting of EIS plots

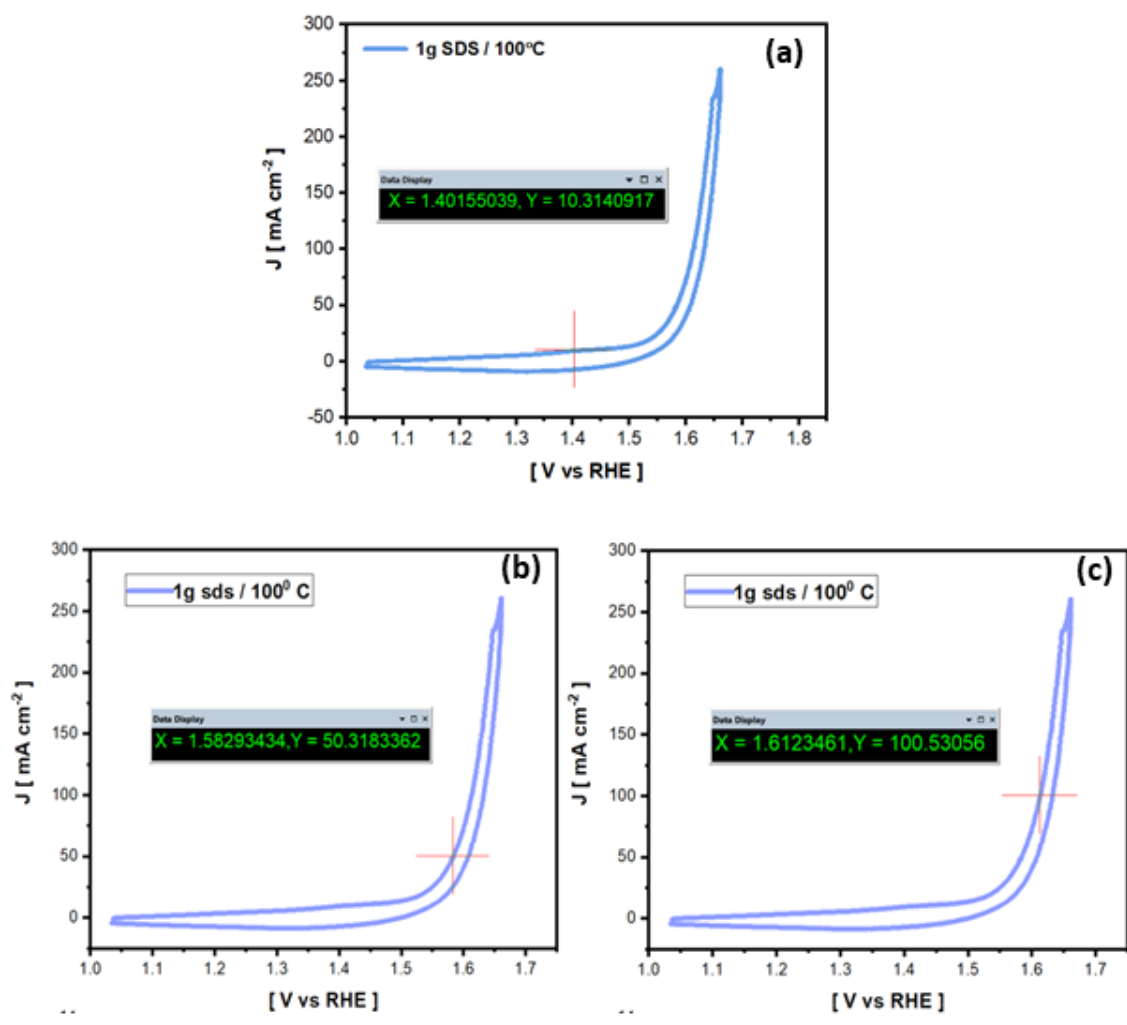

Figure S5: (a-c) Overpotential of NiCo<sub>2</sub>O<sub>4</sub> at 10, 50 and 100 mA, synthesized by using 1g SDS and 100°C temperature.

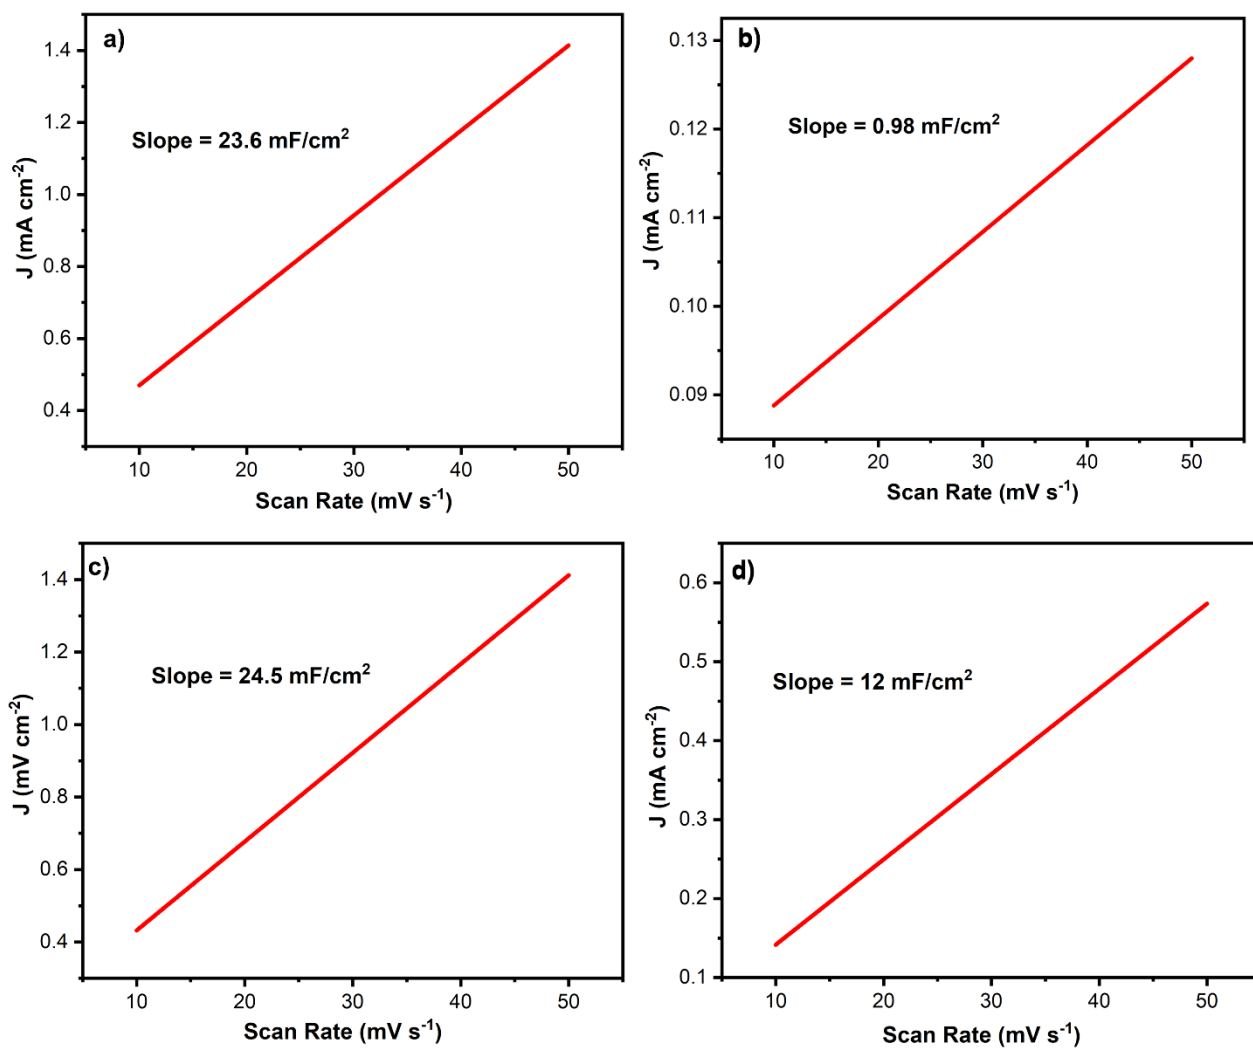

Figure S6: Double layer capacitance (cdl) of  $\text{NiCo}_2\text{O}_4$  synthesized at different SDS amount (a) 1.5 g, (b) 0.5 g and temperatures (c) 150°C (d) 50°C

## Referemces

1. Zhu, C., et al., *Nickel cobalt oxide hollow nanospheres as advanced electrocatalysts for the oxygen evolution reaction*. 2015. **51**(37): p. 7851-7854.
2. Mahala, C. and M. Basu, *Nanosheets of NiCo<sub>2</sub>O<sub>4</sub>/NiO as Efficient and Stable Electrocatalyst for Oxygen Evolution Reaction*. ACS Omega, 2017. **2**(11): p. 7559-7567.
3. Li, Z., et al., *Spinel NiCo<sub>2</sub>O<sub>4</sub> 3-D nanoflowers supported on graphene nanosheets as efficient electrocatalyst for oxygen evolution reaction*. 2019. **44**(31): p. 16120-16131.
4. Wang, J., et al., *Hierarchical NiCo<sub>2</sub>O<sub>4</sub> hollow nanospheres as high efficient bifunctional catalysts for oxygen reduction and evolution reactions*. 2016. **41**(21): p. 8847-8854.
5. Yin, X., et al., *3D hierarchical network NiCo<sub>2</sub>S<sub>4</sub> nanoflakes grown on Ni foam as efficient bifunctional electrocatalysts for both hydrogen and oxygen evolution reaction in alkaline solution*. 2017. **42**(40): p. 25267-25276.
6. Gong, Y., et al., *ACo<sub>2</sub>O<sub>4</sub> (A= Ni, Zn, Mn) nanostructure arrays grown on nickel foam as efficient electrocatalysts for oxygen evolution reaction*. 2018. **43**(31): p. 14360-14368.
7. Liu, G., et al., *Ketjen black carbon supported CoO@ Co- N- C nanochains as an efficient electrocatalyst for oxygen evolution*. 2018. **43**(51): p. 22942-22948.
8. Xie, A., et al., *Nickel-based MOF derived Ni @ NiO/N-C nanowires with core-shell structure for oxygen evolution reaction*. Electrochimica Acta, 2019. **324**: p. 134814.
9. Xie, A., et al., *Three-dimensional graphene surface-mounted nickel-based metal organic framework for oxygen evolution reaction*. Electrochimica Acta, 2019. **305**: p. 338-348.
